# Supplementary material
Source: publisher figshare collection journal article supplement (https://acs.figshare.com/ndownloader/files/5063824)
Supplement: Supplementary file 1 [file 5063824]

 
data_x0003 
 
_audit_creation_method            SHELXL-97 
_chemical_name_systematic 
; 
 ? 
; 
_chemical_name_common             ? 
_chemical_melting_point           ? 
_chemical_formula_moiety           'C15 H25 Cl Cu N4, C24 B F20' 
_chemical_formula_sum 
 'C39 H25 B Cl Cu F20 N4' 
_chemical_formula_weight          1039.43 
 
loop_ 
 _atom_type_symbol 
 _atom_type_description 
 _atom_type_scat_dispersion_real 
 _atom_type_scat_dispersion_imag 
 _atom_type_scat_source 
 'C'  'C'   0.0033   0.0016 
 'International Tables Vol C Tables 4.2.6.8 and 6.1.1.4' 
 'H'  'H'   0.0000   0.0000 
 'International Tables Vol C Tables 4.2.6.8 and 6.1.1.4' 
 'B'  'B'   0.0013   0.0007 
 'International Tables Vol C Tables 4.2.6.8 and 6.1.1.4' 
 'N'  'N'   0.0061   0.0033 
 'International Tables Vol C Tables 4.2.6.8 and 6.1.1.4' 
 'F'  'F'   0.0171   0.0103 
 'International Tables Vol C Tables 4.2.6.8 and 6.1.1.4' 
 'Cl'  'Cl'   0.1484   0.1585 
 'International Tables Vol C Tables 4.2.6.8 and 6.1.1.4' 
 'Cu'  'Cu'   0.3201   1.2651 
 'International Tables Vol C Tables 4.2.6.8 and 6.1.1.4' 
 
 
loop_ 
 _symmetry_equiv_pos_as_xyz 
 'x, y, z' 
 '-x+1/2, -y, z+1/2' 
 '-x, y+1/2, -z+1/2' 
 'x+1/2, -y+1/2, -z' 
 '-x, -y, -z' 
 'x-1/2, y, -z-1/2' 
 'x, -y-1/2, z-1/2' 
 '-x-1/2, y-1/2, z' 
 
_cell_length_a                    21.1337(7) 
_cell_length_b                    16.5669(8) 
_cell_length_c                    22.6324(7) 
_cell_angle_alpha                 90.00 
_cell_angle_beta                  90.00 
_cell_angle_gamma                 90.00 
_cell_volume                      7924.1(5) 
_cell_formula_units_Z             8 
 
_exptl_crystal_description        prism 
_exptl_crystal_colour             'pale yellow' 
_exptl_crystal_density_meas       ? 
_exptl_crystal_density_diffrn     1.743 
_exptl_crystal_density_method     'not measured' 
_exptl_crystal_F_000              4144 
 
_exptl_special_details 
; 
one reference frame taken every 50 frames 
; 
 
_diffrn_radiation_wavelength      0.71073 
_diffrn_standards_number         0
_diffrn_standards_interval_count       0
_diffrn_standards_interval_time       '0'
_diffrn_standards_decay_%         0 
_diffrn_reflns_number             60380 
_diffrn_reflns_av_R_equivalents   0.0285 
_diffrn_reflns_av_sigmaI/netI     0.0200 
_diffrn_reflns_limit_h_min        -27 
_diffrn_reflns_limit_h_max        28 
_diffrn_reflns_limit_k_min        -11 
_diffrn_reflns_limit_k_max        22 
_diffrn_reflns_limit_l_min        -30 
_diffrn_reflns_limit_l_max        30 
_diffrn_reflns_theta_min          4.09 
_diffrn_reflns_theta_max          28.28 
_diffrn_reflns_resolution_max             0.75 
_reflns_number_total              9756 
_reflns_number_gt                 8252 
_reflns_threshold_expression      >2sigma(I) 
 
_computing_data_collection         'Oxford Diffraction CrysAlis CCD'
_computing_cell_refinement         'Oxford Diffraction CrysAlis RED'
_computing_data_reduction          'Oxford Diffraction CrysAlis RED'
_computing_structure_solution         'Sheldrick, G.M. (2000). SHELXTL v6.10.'
_computing_structure_refinement         'Sheldrick, G.M. (2000). SHELXTL v6.10.'
_computing_molecular_graphics         'Sheldrick, G.M. (2000). SHELXTL v6.10.'
_computing_publication_material         'Sheldrick, G.M. (2000). SHELXTL v6.10.'
 
_refine_special_details 
; 
 Refinement of F^2^ against ALL reflections.  The weighted R-factor wR and 
 goodness of fit S are based on F^2^, conventional R-factors R are based 
 on F, with F set to zero for negative F^2^. The threshold expression of 
 F^2^ > 2sigma(F^2^) is used only for calculating R-factors(gt) etc. and is 
 not relevant to the choice of reflections for refinement.  R-factors based 
 on F^2^ are statistically about twice as large as those based on F, and R- 
 factors based on ALL data will be even larger. 
; 
 
_refine_ls_structure_factor_coef  Fsqd  
_refine_ls_matrix_type            full 
_refine_ls_weighting_scheme       calc  
_refine_ls_weighting_details 
 'calc w=1/[\s^2^(Fo^2^)+(0.0476P)^2^+4.3619P] where P=(Fo^2^+2Fc^2^)/3' 
_atom_sites_solution_primary      direct 
_atom_sites_solution_secondary    difmap 
_atom_sites_solution_hydrogens    geom 
_refine_ls_hydrogen_treatment     constr 
_refine_ls_extinction_method      none 
_refine_ls_extinction_coef        ? 
_refine_ls_number_reflns          9756 
_refine_ls_number_parameters      599 
_refine_ls_number_restraints      0 
_refine_ls_R_factor_all           0.0471 
_refine_ls_R_factor_gt            0.0381 
_refine_ls_wR_factor_ref          0.0992 
_refine_ls_wR_factor_gt           0.0938
_refine_ls_goodness_of_fit_ref    1.131 
_refine_ls_restrained_S_all       1.131 
_refine_ls_shift/su_max           0.002 
_refine_ls_shift/su_mean          0.000 
 
loop_ 
 _atom_site_label 
 _atom_site_type_symbol 
 _atom_site_fract_x 
 _atom_site_fract_y 
 _atom_site_fract_z 
 _atom_site_U_iso_or_equiv 
 _atom_site_adp_type 
 _atom_site_occupancy 
 _atom_site_symmetry_multiplicity 
 _atom_site_calc_flag 
 _atom_site_refinement_flags 
 _atom_site_disorder_assembly 
 _atom_site_disorder_group 
B1 B 0.17731(9) 0.63614(11) 0.35865(8) 0.0155(3) Uani 1 1 d . . . 
Cu1 Cu 0.364669(10) 0.857620(13) 0.136293(10) 0.01927(7) Uani 1 1 d . . . 
Cl1 Cl 0.45738(4) 0.67796(4) 0.37664(2) 0.05343(19) Uani 1 1 d . . . 
F1 F 0.28159(5) 0.74526(6) 0.35570(5) 0.0225(2) Uani 1 1 d . . . 
F2 F 0.30368(5) 0.87442(6) 0.42303(5) 0.0267(2) Uani 1 1 d . . . 
F3 F 0.22225(6) 0.91380(7) 0.51229(5) 0.0318(3) Uani 1 1 d . . . 
F4 F 0.11591(6) 0.82328(7) 0.52912(5) 0.0299(3) Uani 1 1 d . . . 
F5 F 0.09111(5) 0.69798(6) 0.46084(5) 0.0234(2) Uani 1 1 d . . . 
F6 F 0.16714(5) 0.55699(7) 0.47097(5) 0.0251(2) Uani 1 1 d . . . 
F7 F 0.08119(6) 0.45107(7) 0.50761(6) 0.0330(3) Uani 1 1 d . . . 
F8 F -0.01698(6) 0.40799(7) 0.43565(6) 0.0367(3) Uani 1 1 d . . . 
F9 F -0.02612(5) 0.47546(7) 0.32563(6) 0.0308(3) Uani 1 1 d . . . 
F10 F 0.05915(5) 0.57902(6) 0.28772(5) 0.0230(2) Uani 1 1 d . . . 
F11 F 0.07184(5) 0.73689(6) 0.32976(5) 0.0202(2) Uani 1 1 d . . . 
F12 F 0.04826(5) 0.81653(7) 0.22980(5) 0.0273(2) Uani 1 1 d . . . 
F13 F 0.12769(6) 0.80177(8) 0.13518(5) 0.0318(3) Uani 1 1 d . . . 
F14 F 0.23482(6) 0.71098(8) 0.14599(5) 0.0314(3) Uani 1 1 d . . . 
F15 F 0.26367(5) 0.64003(6) 0.24633(5) 0.0242(2) Uani 1 1 d . . . 
F16 F 0.19120(5) 0.50785(6) 0.27506(5) 0.0213(2) Uani 1 1 d . . . 
F17 F 0.28133(6) 0.39591(7) 0.26852(5) 0.0280(3) Uani 1 1 d . . . 
F18 F 0.37759(5) 0.39370(7) 0.34918(5) 0.0264(2) Uani 1 1 d . . . 
F19 F 0.38094(5) 0.50718(7) 0.43602(5) 0.0265(2) Uani 1 1 d . . . 
F20 F 0.29306(5) 0.62003(7) 0.44300(5) 0.0245(2) Uani 1 1 d . . . 
N1 N 0.38439(7) 0.79444(9) 0.21089(7) 0.0201(3) Uani 1 1 d . . . 
N2 N 0.40041(7) 0.77948(9) 0.07132(7) 0.0196(3) Uani 1 1 d . . . 
N3 N 0.42790(7) 0.95845(9) 0.13306(7) 0.0195(3) Uani 1 1 d . . . 
N4 N 0.28095(8) 0.90053(10) 0.12403(8) 0.0260(3) Uani 1 1 d . . . 
C1 C 0.38306(9) 0.83298(11) 0.26354(9) 0.0236(4) Uani 1 1 d . . . 
H1A H 0.3660 0.8860 0.2647 0.028 Uiso 1 1 calc R . . 
C2 C 0.40486(9) 0.80024(12) 0.31559(8) 0.0238(4) Uani 1 1 d . . . 
H2A H 0.4033 0.8295 0.3517 0.029 Uiso 1 1 calc R . . 
C3 C 0.42899(10) 0.72299(12) 0.31298(8) 0.0261(4) Uani 1 1 d . . . 
C4 C 0.43040(9) 0.68129(11) 0.26038(8) 0.0230(4) Uani 1 1 d . . . 
H4A H 0.4467 0.6279 0.2588 0.028 Uiso 1 1 calc R . . 
C5 C 0.40755(8) 0.71854(10) 0.20971(8) 0.0187(3) Uani 1 1 d . . . 
C6 C 0.40594(9) 0.67422(11) 0.15204(8) 0.0226(4) Uani 1 1 d . . . 
H6A H 0.3611 0.6649 0.1412 0.027 Uiso 1 1 calc R . . 
H6B H 0.4258 0.6207 0.1579 0.027 Uiso 1 1 calc R . . 
C7 C 0.43878(9) 0.71589(11) 0.10001(8) 0.0217(4) Uani 1 1 d . . . 
H7A H 0.4788 0.7402 0.1142 0.026 Uiso 1 1 calc R . . 
H7B H 0.4498 0.6746 0.0701 0.026 Uiso 1 1 calc R . . 
C8 C 0.34769(10) 0.74181(13) 0.03844(9) 0.0276(4) Uani 1 1 d . . . 
H8A H 0.3648 0.7054 0.0083 0.041 Uiso 1 1 calc R . . 
H8B H 0.3223 0.7839 0.0194 0.041 Uiso 1 1 calc R . . 
H8C H 0.3210 0.7111 0.0659 0.041 Uiso 1 1 calc R . . 
C9 C 0.44077(10) 0.82240(13) 0.02755(8) 0.0261(4) Uani 1 1 d . . . 
H9A H 0.4128 0.8508 -0.0007 0.031 Uiso 1 1 calc R . . 
H9B H 0.4650 0.7816 0.0049 0.031 Uiso 1 1 calc R . . 
C10 C 0.48731(9) 0.88338(13) 0.05300(9) 0.0259(4) Uani 1 1 d . . . 
H10A H 0.5096 0.8581 0.0868 0.031 Uiso 1 1 calc R . . 
H10B H 0.5194 0.8959 0.0225 0.031 Uiso 1 1 calc R . . 
C11 C 0.45776(9) 0.96207(12) 0.07384(8) 0.0244(4) Uani 1 1 d . . . 
H11A H 0.4909 1.0042 0.0744 0.029 Uiso 1 1 calc R . . 
H11B H 0.4253 0.9788 0.0447 0.029 Uiso 1 1 calc R . . 
C12 C 0.39268(10) 1.03444(12) 0.14271(9) 0.0271(4) Uani 1 1 d . . . 
H12A H 0.4221 1.0801 0.1411 0.041 Uiso 1 1 calc R . . 
H12B H 0.3722 1.0329 0.1815 0.041 Uiso 1 1 calc R . . 
H12C H 0.3605 1.0406 0.1119 0.041 Uiso 1 1 calc R . . 
C13 C 0.47726(9) 0.95168(12) 0.17873(9) 0.0246(4) Uani 1 1 d . . . 
H13A H 0.5076 0.9960 0.1742 0.037 Uiso 1 1 calc R . . 
H13B H 0.4993 0.9000 0.1744 0.037 Uiso 1 1 calc R . . 
H13C H 0.4577 0.9546 0.2179 0.037 Uiso 1 1 calc R . . 
C14 C 0.23478(10) 0.93517(12) 0.11988(10) 0.0293(4) Uani 1 1 d . . . 
C15 C 0.17631(11) 0.98135(16) 0.11514(14) 0.0478(6) Uani 1 1 d . . . 
H15A H 0.1643 1.0016 0.1542 0.072 Uiso 1 1 calc R . . 
H15B H 0.1426 0.9465 0.0998 0.072 Uiso 1 1 calc R . . 
H15C H 0.1827 1.0270 0.0882 0.072 Uiso 1 1 calc R . . 
C21 C 0.18673(8) 0.71198(10) 0.40544(8) 0.0168(3) Uani 1 1 d . . . 
C22 C 0.23900(8) 0.76220(10) 0.39844(8) 0.0182(3) Uani 1 1 d . . . 
C23 C 0.25156(9) 0.82911(10) 0.43292(8) 0.0208(4) Uani 1 1 d . . . 
C24 C 0.21055(9) 0.84948(10) 0.47765(8) 0.0225(4) Uani 1 1 d . . . 
C25 C 0.15727(9) 0.80348(11) 0.48628(8) 0.0214(4) Uani 1 1 d . . . 
C26 C 0.14592(8) 0.73708(10) 0.45013(8) 0.0182(3) Uani 1 1 d . . . 
C27 C 0.11796(8) 0.57601(10) 0.37781(8) 0.0176(3) Uani 1 1 d . . . 
C28 C 0.11989(9) 0.53908(10) 0.43315(8) 0.0204(4) Uani 1 1 d . . . 
C29 C 0.07586(9) 0.48368(11) 0.45305(9) 0.0241(4) Uani 1 1 d . . . 
C30 C 0.02626(9) 0.46179(11) 0.41708(10) 0.0263(4) Uani 1 1 d . . . 
C31 C 0.02208(9) 0.49590(11) 0.36190(9) 0.0234(4) Uani 1 1 d . . . 
C32 C 0.06740(8) 0.55096(10) 0.34333(8) 0.0193(3) Uani 1 1 d . . . 
C33 C 0.16727(8) 0.68087(10) 0.29387(8) 0.0166(3) Uani 1 1 d . . . 
C34 C 0.11437(8) 0.72926(10) 0.28516(8) 0.0167(3) Uani 1 1 d . . . 
C35 C 0.10027(8) 0.77020(10) 0.23369(8) 0.0198(3) Uani 1 1 d . . . 
C36 C 0.14057(9) 0.76365(11) 0.18607(8) 0.0223(4) Uani 1 1 d . . . 
C37 C 0.19466(9) 0.71820(11) 0.19197(8) 0.0221(4) Uani 1 1 d . . . 
C38 C 0.20766(8) 0.67990(10) 0.24512(8) 0.0189(3) Uani 1 1 d . . . 
C39 C 0.23775(8) 0.57253(10) 0.35795(8) 0.0165(3) Uani 1 1 d . . . 
C40 C 0.23819(8) 0.51113(10) 0.31580(8) 0.0178(3) Uani 1 1 d . . . 
C41 C 0.28407(9) 0.45227(10) 0.31122(8) 0.0193(3) Uani 1 1 d . . . 
C42 C 0.33316(8) 0.45116(10) 0.35155(8) 0.0198(4) Uani 1 1 d . . . 
C43 C 0.33459(8) 0.50918(11) 0.39521(8) 0.0199(3) Uani 1 1 d . . . 
C44 C 0.28765(8) 0.56745(10) 0.39768(8) 0.0182(3) Uani 1 1 d . . . 
 
loop_ 
 _atom_site_aniso_label 
 _atom_site_aniso_U_11 
 _atom_site_aniso_U_22 
 _atom_site_aniso_U_33 
 _atom_site_aniso_U_23 
 _atom_site_aniso_U_13 
 _atom_site_aniso_U_12 
B1 0.0122(8) 0.0157(8) 0.0187(9) -0.0009(7) 0.0016(7) -0.0003(7) 
Cu1 0.01685(11) 0.01917(11) 0.02180(12) 0.00110(8) -0.00080(8) 0.00318(8) 
Cl1 0.0840(5) 0.0581(4) 0.0183(2) 0.0061(2) -0.0018(3) 0.0326(4) 
F1 0.0173(5) 0.0223(5) 0.0279(6) -0.0035(4) 0.0054(4) -0.0040(4) 
F2 0.0239(6) 0.0205(5) 0.0355(6) -0.0005(5) -0.0062(5) -0.0071(4) 
F3 0.0397(7) 0.0242(6) 0.0314(6) -0.0122(5) -0.0079(5) 0.0001(5) 
F4 0.0342(6) 0.0328(6) 0.0227(6) -0.0088(5) 0.0040(5) 0.0065(5) 
F5 0.0185(5) 0.0253(5) 0.0264(6) -0.0027(4) 0.0068(4) -0.0021(4) 
F6 0.0247(6) 0.0267(5) 0.0238(6) 0.0046(4) -0.0007(4) -0.0004(4) 
F7 0.0379(7) 0.0269(6) 0.0341(7) 0.0120(5) 0.0110(5) 0.0000(5) 
F8 0.0313(6) 0.0243(6) 0.0544(8) 0.0006(5) 0.0172(6) -0.0121(5) 
F9 0.0195(5) 0.0277(6) 0.0451(7) -0.0106(5) 0.0011(5) -0.0087(5) 
F10 0.0207(5) 0.0224(5) 0.0258(6) -0.0024(4) -0.0035(4) -0.0047(4) 
F11 0.0151(5) 0.0220(5) 0.0236(5) -0.0010(4) 0.0042(4) 0.0027(4) 
F12 0.0223(5) 0.0249(5) 0.0349(6) 0.0051(5) -0.0039(5) 0.0073(4) 
F13 0.0384(7) 0.0339(6) 0.0231(6) 0.0104(5) -0.0030(5) 0.0009(5) 
F14 0.0324(6) 0.0374(7) 0.0245(6) 0.0042(5) 0.0119(5) 0.0018(5) 
F15 0.0172(5) 0.0275(5) 0.0280(6) 0.0037(5) 0.0070(4) 0.0053(4) 
F16 0.0185(5) 0.0203(5) 0.0252(5) -0.0046(4) -0.0064(4) 0.0005(4) 
F17 0.0282(6) 0.0229(5) 0.0329(6) -0.0123(5) -0.0034(5) 0.0053(4) 
F18 0.0196(5) 0.0212(5) 0.0386(7) -0.0038(5) -0.0012(5) 0.0075(4) 
F19 0.0214(5) 0.0282(6) 0.0298(6) -0.0014(5) -0.0100(5) 0.0050(4) 
F20 0.0257(6) 0.0240(5) 0.0237(5) -0.0081(4) -0.0076(4) 0.0043(4) 
N1 0.0208(7) 0.0180(7) 0.0216(8) 0.0006(6) 0.0013(6) 0.0031(6) 
N2 0.0188(7) 0.0232(7) 0.0167(7) -0.0017(6) -0.0045(6) 0.0017(6) 
N3 0.0193(7) 0.0208(7) 0.0185(7) 0.0008(6) -0.0009(6) 0.0011(6) 
N4 0.0191(8) 0.0254(8) 0.0334(9) 0.0005(7) -0.0006(7) 0.0019(6) 
C1 0.0259(9) 0.0190(8) 0.0259(9) -0.0006(7) 0.0067(8) 0.0021(7) 
C2 0.0258(9) 0.0265(9) 0.0191(9) -0.0010(7) 0.0079(7) -0.0005(7) 
C3 0.0277(10) 0.0321(10) 0.0184(9) 0.0056(7) 0.0031(7) 0.0044(8) 
C4 0.0241(9) 0.0209(8) 0.0241(9) 0.0041(7) 0.0029(7) 0.0044(7) 
C5 0.0155(8) 0.0172(8) 0.0234(9) -0.0003(7) 0.0010(7) 0.0014(6) 
C6 0.0257(9) 0.0171(8) 0.0252(9) -0.0033(7) -0.0060(7) 0.0027(7) 
C7 0.0212(9) 0.0236(9) 0.0205(9) -0.0065(7) -0.0051(7) 0.0066(7) 
C8 0.0270(10) 0.0304(10) 0.0254(10) -0.0043(8) -0.0114(8) 0.0007(8) 
C9 0.0275(10) 0.0341(10) 0.0167(9) -0.0020(7) 0.0011(7) 0.0023(8) 
C10 0.0222(9) 0.0341(10) 0.0214(9) -0.0011(8) 0.0052(7) 0.0002(8) 
C11 0.0255(9) 0.0271(9) 0.0206(9) 0.0025(7) 0.0024(7) -0.0028(8) 
C12 0.0279(10) 0.0206(9) 0.0327(11) 0.0009(8) 0.0031(8) 0.0017(8) 
C13 0.0238(9) 0.0260(9) 0.0238(9) 0.0004(7) -0.0035(7) -0.0042(7) 
C14 0.0234(10) 0.0249(9) 0.0397(12) 0.0023(8) 0.0018(8) 0.0029(8) 
C15 0.0276(12) 0.0423(13) 0.0736(18) 0.0132(13) 0.0083(12) 0.0181(10) 
C21 0.0158(8) 0.0158(7) 0.0187(8) 0.0009(6) -0.0017(6) 0.0016(6) 
C22 0.0172(8) 0.0170(8) 0.0203(8) 0.0000(6) -0.0016(6) 0.0020(6) 
C23 0.0198(8) 0.0155(7) 0.0270(9) 0.0022(7) -0.0061(7) -0.0026(7) 
C24 0.0283(10) 0.0158(8) 0.0234(9) -0.0041(7) -0.0093(7) 0.0016(7) 
C25 0.0241(9) 0.0234(8) 0.0166(8) -0.0009(7) -0.0010(7) 0.0074(7) 
C26 0.0168(8) 0.0191(8) 0.0188(8) 0.0010(6) -0.0011(6) 0.0015(6) 
C27 0.0156(8) 0.0132(7) 0.0241(9) -0.0010(6) 0.0043(7) 0.0007(6) 
C28 0.0184(8) 0.0171(8) 0.0258(9) -0.0005(7) 0.0034(7) 0.0008(7) 
C29 0.0264(9) 0.0180(8) 0.0278(10) 0.0047(7) 0.0102(8) 0.0029(7) 
C30 0.0209(9) 0.0145(8) 0.0434(12) -0.0020(8) 0.0130(8) -0.0038(7) 
C31 0.0148(8) 0.0186(8) 0.0370(11) -0.0079(7) 0.0045(7) -0.0015(7) 
C32 0.0181(8) 0.0143(7) 0.0255(9) -0.0028(7) 0.0034(7) 0.0009(6) 
C33 0.0138(8) 0.0144(7) 0.0216(8) -0.0025(6) 0.0004(6) -0.0028(6) 
C34 0.0141(8) 0.0157(7) 0.0202(8) -0.0017(6) 0.0013(6) -0.0023(6) 
C35 0.0157(8) 0.0158(8) 0.0280(9) -0.0015(7) -0.0032(7) 0.0001(6) 
C36 0.0270(9) 0.0205(8) 0.0195(9) 0.0035(7) -0.0028(7) -0.0039(7) 
C37 0.0227(9) 0.0226(8) 0.0210(9) -0.0005(7) 0.0054(7) -0.0030(7) 
C38 0.0165(8) 0.0166(7) 0.0235(9) -0.0010(7) 0.0014(7) -0.0004(6) 
C39 0.0143(8) 0.0151(7) 0.0200(8) 0.0001(6) 0.0016(6) -0.0010(6) 
C40 0.0135(8) 0.0193(8) 0.0207(8) 0.0009(6) -0.0016(6) -0.0015(6) 
C41 0.0194(8) 0.0156(7) 0.0229(9) -0.0027(6) 0.0014(7) -0.0010(6) 
C42 0.0155(8) 0.0160(8) 0.0277(9) 0.0004(7) 0.0023(7) 0.0038(6) 
C43 0.0163(8) 0.0200(8) 0.0233(9) 0.0003(7) -0.0029(7) -0.0001(7) 
C44 0.0178(8) 0.0167(8) 0.0200(8) -0.0027(6) -0.0001(6) -0.0014(6) 
 
_geom_special_details 
; 
 All esds (except the esd in the dihedral angle between two l.s. planes) 
 are estimated using the full covariance matrix.  The cell esds are taken 
 into account individually in the estimation of esds in distances, angles 
 and torsion angles; correlations between esds in cell parameters are only 
 used when they are defined by crystal symmetry.  An approximate (isotropic) 
 treatment of cell esds is used for estimating esds involving l.s. planes. 
; 
 
loop_ 
 _geom_bond_atom_site_label_1 
 _geom_bond_atom_site_label_2 
 _geom_bond_distance 
 _geom_bond_site_symmetry_2 
 _geom_bond_publ_flag 
B1 C21 1.655(3) . ? 
B1 C39 1.656(3) . ? 
B1 C33 1.656(3) . ? 
B1 C27 1.659(3) . ? 
Cu1 N4 1.9269(16) . ? 
Cu1 N1 2.0297(15) . ? 
Cu1 N2 2.0997(15) . ? 
Cu1 N3 2.1405(16) . ? 
Cl1 C3 1.730(2) . ? 
F1 C22 1.351(2) . ? 
F2 C23 1.352(2) . ? 
F3 C24 1.346(2) . ? 
F4 C25 1.346(2) . ? 
F5 C26 1.349(2) . ? 
F6 C28 1.348(2) . ? 
F7 C29 1.353(2) . ? 
F8 C30 1.344(2) . ? 
F9 C31 1.351(2) . ? 
F10 C32 1.353(2) . ? 
F11 C34 1.3573(19) . ? 
F12 C35 1.343(2) . ? 
F13 C36 1.341(2) . ? 
F14 C37 1.348(2) . ? 
F15 C38 1.356(2) . ? 
F16 C40 1.3561(19) . ? 
F17 C41 1.345(2) . ? 
F18 C42 1.338(2) . ? 
F19 C43 1.347(2) . ? 
F20 C44 1.351(2) . ? 
N1 C5 1.350(2) . ? 
N1 C1 1.352(2) . ? 
N2 C8 1.478(2) . ? 
N2 C7 1.480(2) . ? 
N2 C9 1.488(2) . ? 
N3 C13 1.473(2) . ? 
N3 C12 1.479(2) . ? 
N3 C11 1.483(2) . ? 
N4 C14 1.136(3) . ? 
C1 C2 1.376(3) . ? 
C1 H1A 0.9500 . ? 
C2 C3 1.379(3) . ? 
C2 H2A 0.9500 . ? 
C3 C4 1.377(3) . ? 
C4 C5 1.389(3) . ? 
C4 H4A 0.9500 . ? 
C5 C6 1.498(3) . ? 
C6 C7 1.532(3) . ? 
C6 H6A 0.9900 . ? 
C6 H6B 0.9900 . ? 
C7 H7A 0.9900 . ? 
C7 H7B 0.9900 . ? 
C8 H8A 0.9800 . ? 
C8 H8B 0.9800 . ? 
C8 H8C 0.9800 . ? 
C9 C10 1.523(3) . ? 
C9 H9A 0.9900 . ? 
C9 H9B 0.9900 . ? 
C10 C11 1.521(3) . ? 
C10 H10A 0.9900 . ? 
C10 H10B 0.9900 . ? 
C11 H11A 0.9900 . ? 
C11 H11B 0.9900 . ? 
C12 H12A 0.9800 . ? 
C12 H12B 0.9800 . ? 
C12 H12C 0.9800 . ? 
C13 H13A 0.9800 . ? 
C13 H13B 0.9800 . ? 
C13 H13C 0.9800 . ? 
C14 C15 1.457(3) . ? 
C15 H15A 0.9800 . ? 
C15 H15B 0.9800 . ? 
C15 H15C 0.9800 . ? 
C21 C22 1.392(2) . ? 
C21 C26 1.393(2) . ? 
C22 C23 1.381(2) . ? 
C23 C24 1.375(3) . ? 
C24 C25 1.373(3) . ? 
C25 C26 1.392(3) . ? 
C27 C32 1.387(3) . ? 
C27 C28 1.395(3) . ? 
C28 C29 1.382(3) . ? 
C29 C30 1.376(3) . ? 
C30 C31 1.374(3) . ? 
C31 C32 1.388(3) . ? 
C33 C34 1.390(2) . ? 
C33 C38 1.395(2) . ? 
C34 C35 1.380(3) . ? 
C35 C36 1.378(3) . ? 
C36 C37 1.375(3) . ? 
C37 C38 1.387(3) . ? 
C39 C44 1.388(2) . ? 
C39 C40 1.395(2) . ? 
C40 C41 1.379(2) . ? 
C41 C42 1.382(3) . ? 
C42 C43 1.379(3) . ? 
C43 C44 1.385(2) . ? 
 
loop_ 
 _geom_angle_atom_site_label_1 
 _geom_angle_atom_site_label_2 
 _geom_angle_atom_site_label_3 
 _geom_angle 
 _geom_angle_site_symmetry_1 
 _geom_angle_site_symmetry_3 
 _geom_angle_publ_flag 
C21 B1 C39 113.35(14) . . ? 
C21 B1 C33 104.01(13) . . ? 
C39 B1 C33 112.04(14) . . ? 
C21 B1 C27 112.29(14) . . ? 
C39 B1 C27 101.74(13) . . ? 
C33 B1 C27 113.77(14) . . ? 
N4 Cu1 N1 119.91(7) . . ? 
N4 Cu1 N2 117.19(7) . . ? 
N1 Cu1 N2 100.99(6) . . ? 
N4 Cu1 N3 106.29(6) . . ? 
N1 Cu1 N3 107.62(6) . . ? 
N2 Cu1 N3 103.45(6) . . ? 
C5 N1 C1 117.71(16) . . ? 
C5 N1 Cu1 122.59(12) . . ? 
C1 N1 Cu1 119.02(12) . . ? 
C8 N2 C7 109.48(14) . . ? 
C8 N2 C9 107.37(15) . . ? 
C7 N2 C9 108.56(14) . . ? 
C8 N2 Cu1 109.98(12) . . ? 
C7 N2 Cu1 109.20(11) . . ? 
C9 N2 Cu1 112.20(11) . . ? 
C13 N3 C12 108.52(15) . . ? 
C13 N3 C11 109.64(15) . . ? 
C12 N3 C11 108.26(15) . . ? 
C13 N3 Cu1 111.02(11) . . ? 
C12 N3 Cu1 110.18(12) . . ? 
C11 N3 Cu1 109.16(11) . . ? 
C14 N4 Cu1 170.79(17) . . ? 
N1 C1 C2 124.13(17) . . ? 
N1 C1 H1A 117.9 . . ? 
C2 C1 H1A 117.9 . . ? 
C1 C2 C3 116.93(17) . . ? 
C1 C2 H2A 121.5 . . ? 
C3 C2 H2A 121.5 . . ? 
C4 C3 C2 120.71(18) . . ? 
C4 C3 Cl1 119.75(15) . . ? 
C2 C3 Cl1 119.53(15) . . ? 
C3 C4 C5 118.91(17) . . ? 
C3 C4 H4A 120.5 . . ? 
C5 C4 H4A 120.5 . . ? 
N1 C5 C4 121.59(17) . . ? 
N1 C5 C6 117.75(16) . . ? 
C4 C5 C6 120.64(15) . . ? 
C5 C6 C7 116.02(15) . . ? 
C5 C6 H6A 108.3 . . ? 
C7 C6 H6A 108.3 . . ? 
C5 C6 H6B 108.3 . . ? 
C7 C6 H6B 108.3 . . ? 
H6A C6 H6B 107.4 . . ? 
N2 C7 C6 114.21(15) . . ? 
N2 C7 H7A 108.7 . . ? 
C6 C7 H7A 108.7 . . ? 
N2 C7 H7B 108.7 . . ? 
C6 C7 H7B 108.7 . . ? 
H7A C7 H7B 107.6 . . ? 
N2 C8 H8A 109.5 . . ? 
N2 C8 H8B 109.5 . . ? 
H8A C8 H8B 109.5 . . ? 
N2 C8 H8C 109.5 . . ? 
H8A C8 H8C 109.5 . . ? 
H8B C8 H8C 109.5 . . ? 
N2 C9 C10 115.81(15) . . ? 
N2 C9 H9A 108.3 . . ? 
C10 C9 H9A 108.3 . . ? 
N2 C9 H9B 108.3 . . ? 
C10 C9 H9B 108.3 . . ? 
H9A C9 H9B 107.4 . . ? 
C11 C10 C9 114.87(17) . . ? 
C11 C10 H10A 108.5 . . ? 
C9 C10 H10A 108.5 . . ? 
C11 C10 H10B 108.5 . . ? 
C9 C10 H10B 108.5 . . ? 
H10A C10 H10B 107.5 . . ? 
N3 C11 C10 114.87(16) . . ? 
N3 C11 H11A 108.5 . . ? 
C10 C11 H11A 108.5 . . ? 
N3 C11 H11B 108.5 . . ? 
C10 C11 H11B 108.5 . . ? 
H11A C11 H11B 107.5 . . ? 
N3 C12 H12A 109.5 . . ? 
N3 C12 H12B 109.5 . . ? 
H12A C12 H12B 109.5 . . ? 
N3 C12 H12C 109.5 . . ? 
H12A C12 H12C 109.5 . . ? 
H12B C12 H12C 109.5 . . ? 
N3 C13 H13A 109.5 . . ? 
N3 C13 H13B 109.5 . . ? 
H13A C13 H13B 109.5 . . ? 
N3 C13 H13C 109.5 . . ? 
H13A C13 H13C 109.5 . . ? 
H13B C13 H13C 109.5 . . ? 
N4 C14 C15 178.6(3) . . ? 
C14 C15 H15A 109.5 . . ? 
C14 C15 H15B 109.5 . . ? 
H15A C15 H15B 109.5 . . ? 
C14 C15 H15C 109.5 . . ? 
H15A C15 H15C 109.5 . . ? 
H15B C15 H15C 109.5 . . ? 
C22 C21 C26 113.31(16) . . ? 
C22 C21 B1 118.44(15) . . ? 
C26 C21 B1 128.08(15) . . ? 
F1 C22 C23 116.32(15) . . ? 
F1 C22 C21 119.08(15) . . ? 
C23 C22 C21 124.59(17) . . ? 
F2 C23 C24 119.97(16) . . ? 
F2 C23 C22 120.57(17) . . ? 
C24 C23 C22 119.46(17) . . ? 
F3 C24 C25 120.47(18) . . ? 
F3 C24 C23 120.49(17) . . ? 
C25 C24 C23 119.03(16) . . ? 
F4 C25 C24 119.97(16) . . ? 
F4 C25 C26 120.27(17) . . ? 
C24 C25 C26 119.76(17) . . ? 
F5 C26 C25 114.96(15) . . ? 
F5 C26 C21 121.25(15) . . ? 
C25 C26 C21 123.78(17) . . ? 
C32 C27 C28 113.38(16) . . ? 
C32 C27 B1 127.95(16) . . ? 
C28 C27 B1 118.42(16) . . ? 
F6 C28 C29 115.97(17) . . ? 
F6 C28 C27 119.69(15) . . ? 
C29 C28 C27 124.34(18) . . ? 
F7 C29 C30 119.88(17) . . ? 
F7 C29 C28 120.43(18) . . ? 
C30 C29 C28 119.68(18) . . ? 
F8 C30 C31 120.89(19) . . ? 
F8 C30 C29 120.52(19) . . ? 
C31 C30 C29 118.58(17) . . ? 
F9 C31 C30 119.85(17) . . ? 
F9 C31 C32 120.06(18) . . ? 
C30 C31 C32 120.09(18) . . ? 
F10 C32 C27 121.33(16) . . ? 
F10 C32 C31 114.75(16) . . ? 
C27 C32 C31 123.92(18) . . ? 
C34 C33 C38 112.75(16) . . ? 
C34 C33 B1 119.13(15) . . ? 
C38 C33 B1 128.06(15) . . ? 
F11 C34 C35 116.03(15) . . ? 
F11 C34 C33 118.74(15) . . ? 
C35 C34 C33 125.22(16) . . ? 
F12 C35 C36 119.96(16) . . ? 
F12 C35 C34 120.84(16) . . ? 
C36 C35 C34 119.20(16) . . ? 
F13 C36 C37 120.64(17) . . ? 
F13 C36 C35 120.61(17) . . ? 
C37 C36 C35 118.75(17) . . ? 
F14 C37 C36 119.79(17) . . ? 
F14 C37 C38 120.28(16) . . ? 
C36 C37 C38 119.94(17) . . ? 
F15 C38 C37 114.40(15) . . ? 
F15 C38 C33 121.59(16) . . ? 
C37 C38 C33 124.01(16) . . ? 
C44 C39 C40 113.19(15) . . ? 
C44 C39 B1 128.19(15) . . ? 
C40 C39 B1 118.41(15) . . ? 
F16 C40 C41 115.81(15) . . ? 
F16 C40 C39 119.30(15) . . ? 
C41 C40 C39 124.88(16) . . ? 
F17 C41 C40 120.97(16) . . ? 
F17 C41 C42 119.84(15) . . ? 
C40 C41 C42 119.19(16) . . ? 
F18 C42 C43 120.62(16) . . ? 
F18 C42 C41 120.65(16) . . ? 
C43 C42 C41 118.71(16) . . ? 
F19 C43 C42 119.35(15) . . ? 
F19 C43 C44 120.69(16) . . ? 
C42 C43 C44 119.94(16) . . ? 
F20 C44 C43 114.81(15) . . ? 
F20 C44 C39 121.14(15) . . ? 
C43 C44 C39 124.05(16) . . ? 
 
loop_ 
 _geom_torsion_atom_site_label_1 
 _geom_torsion_atom_site_label_2 
 _geom_torsion_atom_site_label_3 
 _geom_torsion_atom_site_label_4 
 _geom_torsion 
 _geom_torsion_site_symmetry_1 
 _geom_torsion_site_symmetry_2 
 _geom_torsion_site_symmetry_3 
 _geom_torsion_site_symmetry_4 
 _geom_torsion_publ_flag 
N4 Cu1 N1 C5 123.71(14) . . . . ? 
N2 Cu1 N1 C5 -6.74(15) . . . . ? 
N3 Cu1 N1 C5 -114.81(14) . . . . ? 
N4 Cu1 N1 C1 -65.99(16) . . . . ? 
N2 Cu1 N1 C1 163.56(14) . . . . ? 
N3 Cu1 N1 C1 55.49(15) . . . . ? 
N4 Cu1 N2 C8 -23.77(14) . . . . ? 
N1 Cu1 N2 C8 108.37(12) . . . . ? 
N3 Cu1 N2 C8 -140.32(12) . . . . ? 
N4 Cu1 N2 C7 -143.92(12) . . . . ? 
N1 Cu1 N2 C7 -11.79(13) . . . . ? 
N3 Cu1 N2 C7 99.53(12) . . . . ? 
N4 Cu1 N2 C9 95.68(13) . . . . ? 
N1 Cu1 N2 C9 -132.19(12) . . . . ? 
N3 Cu1 N2 C9 -20.87(13) . . . . ? 
N4 Cu1 N3 C13 139.26(12) . . . . ? 
N1 Cu1 N3 C13 9.63(13) . . . . ? 
N2 Cu1 N3 C13 -96.73(12) . . . . ? 
N4 Cu1 N3 C12 19.00(14) . . . . ? 
N1 Cu1 N3 C12 -110.63(12) . . . . ? 
N2 Cu1 N3 C12 143.01(12) . . . . ? 
N4 Cu1 N3 C11 -99.76(13) . . . . ? 
N1 Cu1 N3 C11 130.61(12) . . . . ? 
N2 Cu1 N3 C11 24.25(13) . . . . ? 
N1 Cu1 N4 C14 95.7(11) . . . . ? 
N2 Cu1 N4 C14 -141.5(11) . . . . ? 
N3 Cu1 N4 C14 -26.5(11) . . . . ? 
C5 N1 C1 C2 1.3(3) . . . . ? 
Cu1 N1 C1 C2 -169.52(15) . . . . ? 
N1 C1 C2 C3 -0.5(3) . . . . ? 
C1 C2 C3 C4 -0.5(3) . . . . ? 
C1 C2 C3 Cl1 179.90(15) . . . . ? 
C2 C3 C4 C5 0.5(3) . . . . ? 
Cl1 C3 C4 C5 -179.83(15) . . . . ? 
C1 N1 C5 C4 -1.1(3) . . . . ? 
Cu1 N1 C5 C4 169.27(14) . . . . ? 
C1 N1 C5 C6 176.88(16) . . . . ? 
Cu1 N1 C5 C6 -12.7(2) . . . . ? 
C3 C4 C5 N1 0.3(3) . . . . ? 
C3 C4 C5 C6 -177.67(18) . . . . ? 
N1 C5 C6 C7 56.0(2) . . . . ? 
C4 C5 C6 C7 -125.96(18) . . . . ? 
C8 N2 C7 C6 -70.89(19) . . . . ? 
C9 N2 C7 C6 172.19(15) . . . . ? 
Cu1 N2 C7 C6 49.58(17) . . . . ? 
C5 C6 C7 N2 -80.6(2) . . . . ? 
C8 N2 C9 C10 164.34(16) . . . . ? 
C7 N2 C9 C10 -77.4(2) . . . . ? 
Cu1 N2 C9 C10 43.38(19) . . . . ? 
N2 C9 C10 C11 -74.7(2) . . . . ? 
C13 N3 C11 C10 70.9(2) . . . . ? 
C12 N3 C11 C10 -170.89(16) . . . . ? 
Cu1 N3 C11 C10 -50.94(18) . . . . ? 
C9 C10 C11 N3 80.4(2) . . . . ? 
Cu1 N4 C14 C15 1(12) . . . . ? 
C39 B1 C21 C22 58.5(2) . . . . ? 
C33 B1 C21 C22 -63.41(19) . . . . ? 
C27 B1 C21 C22 173.13(15) . . . . ? 
C39 B1 C21 C26 -126.53(18) . . . . ? 
C33 B1 C21 C26 111.54(18) . . . . ? 
C27 B1 C21 C26 -11.9(2) . . . . ? 
C26 C21 C22 F1 -178.73(15) . . . . ? 
B1 C21 C22 F1 -3.1(2) . . . . ? 
C26 C21 C22 C23 2.0(3) . . . . ? 
B1 C21 C22 C23 177.72(16) . . . . ? 
F1 C22 C23 F2 0.6(2) . . . . ? 
C21 C22 C23 F2 179.83(16) . . . . ? 
F1 C22 C23 C24 -179.35(15) . . . . ? 
C21 C22 C23 C24 -0.1(3) . . . . ? 
F2 C23 C24 F3 -0.8(3) . . . . ? 
C22 C23 C24 F3 179.14(16) . . . . ? 
F2 C23 C24 C25 178.85(16) . . . . ? 
C22 C23 C24 C25 -1.2(3) . . . . ? 
F3 C24 C25 F4 0.9(3) . . . . ? 
C23 C24 C25 F4 -178.76(16) . . . . ? 
F3 C24 C25 C26 -179.90(16) . . . . ? 
C23 C24 C25 C26 0.4(3) . . . . ? 
F4 C25 C26 F5 1.7(2) . . . . ? 
C24 C25 C26 F5 -177.51(15) . . . . ? 
F4 C25 C26 C21 -179.06(16) . . . . ? 
C24 C25 C26 C21 1.7(3) . . . . ? 
C22 C21 C26 F5 176.35(15) . . . . ? 
B1 C21 C26 F5 1.2(3) . . . . ? 
C22 C21 C26 C25 -2.8(3) . . . . ? 
B1 C21 C26 C25 -178.01(17) . . . . ? 
C21 B1 C27 C32 127.75(18) . . . . ? 
C39 B1 C27 C32 -110.74(18) . . . . ? 
C33 B1 C27 C32 9.9(2) . . . . ? 
C21 B1 C27 C28 -58.5(2) . . . . ? 
C39 B1 C27 C28 63.06(18) . . . . ? 
C33 B1 C27 C28 -176.26(15) . . . . ? 
C32 C27 C28 F6 179.06(15) . . . . ? 
B1 C27 C28 F6 4.4(2) . . . . ? 
C32 C27 C28 C29 -0.9(3) . . . . ? 
B1 C27 C28 C29 -175.55(16) . . . . ? 
F6 C28 C29 F7 0.4(2) . . . . ? 
C27 C28 C29 F7 -179.65(16) . . . . ? 
F6 C28 C29 C30 -179.72(16) . . . . ? 
C27 C28 C29 C30 0.2(3) . . . . ? 
F7 C29 C30 F8 -0.2(3) . . . . ? 
C28 C29 C30 F8 179.97(16) . . . . ? 
F7 C29 C30 C31 180.00(16) . . . . ? 
C28 C29 C30 C31 0.1(3) . . . . ? 
F8 C30 C31 F9 0.1(3) . . . . ? 
C29 C30 C31 F9 179.96(16) . . . . ? 
F8 C30 C31 C32 -179.59(16) . . . . ? 
C29 C30 C31 C32 0.2(3) . . . . ? 
C28 C27 C32 F10 -178.25(15) . . . . ? 
B1 C27 C32 F10 -4.2(3) . . . . ? 
C28 C27 C32 C31 1.3(3) . . . . ? 
B1 C27 C32 C31 175.33(16) . . . . ? 
F9 C31 C32 F10 -1.2(2) . . . . ? 
C30 C31 C32 F10 178.53(16) . . . . ? 
F9 C31 C32 C27 179.26(16) . . . . ? 
C30 C31 C32 C27 -1.0(3) . . . . ? 
C21 B1 C33 C34 -64.25(18) . . . . ? 
C39 B1 C33 C34 172.95(14) . . . . ? 
C27 B1 C33 C34 58.2(2) . . . . ? 
C21 B1 C33 C38 112.46(18) . . . . ? 
C39 B1 C33 C38 -10.3(2) . . . . ? 
C27 B1 C33 C38 -125.05(18) . . . . ? 
C38 C33 C34 F11 -178.61(14) . . . . ? 
B1 C33 C34 F11 -1.4(2) . . . . ? 
C38 C33 C34 C35 2.6(2) . . . . ? 
B1 C33 C34 C35 179.76(16) . . . . ? 
F11 C34 C35 F12 2.1(2) . . . . ? 
C33 C34 C35 F12 -179.08(15) . . . . ? 
F11 C34 C35 C36 -178.46(15) . . . . ? 
C33 C34 C35 C36 0.4(3) . . . . ? 
F12 C35 C36 F13 -1.5(3) . . . . ? 
C34 C35 C36 F13 179.05(16) . . . . ? 
F12 C35 C36 C37 177.64(16) . . . . ? 
C34 C35 C36 C37 -1.8(3) . . . . ? 
F13 C36 C37 F14 -0.8(3) . . . . ? 
C35 C36 C37 F14 -179.95(16) . . . . ? 
F13 C36 C37 C38 179.25(16) . . . . ? 
C35 C36 C37 C38 0.1(3) . . . . ? 
F14 C37 C38 F15 3.0(2) . . . . ? 
C36 C37 C38 F15 -177.14(16) . . . . ? 
F14 C37 C38 C33 -176.69(16) . . . . ? 
C36 C37 C38 C33 3.2(3) . . . . ? 
C34 C33 C38 F15 176.02(15) . . . . ? 
B1 C33 C38 F15 -0.9(3) . . . . ? 
C34 C33 C38 C37 -4.4(2) . . . . ? 
B1 C33 C38 C37 178.76(16) . . . . ? 
C21 B1 C39 C44 12.4(2) . . . . ? 
C33 B1 C39 C44 129.73(18) . . . . ? 
C27 B1 C39 C44 -108.38(19) . . . . ? 
C21 B1 C39 C40 -173.26(15) . . . . ? 
C33 B1 C39 C40 -55.9(2) . . . . ? 
C27 B1 C39 C40 65.96(18) . . . . ? 
C44 C39 C40 F16 178.51(15) . . . . ? 
B1 C39 C40 F16 3.3(2) . . . . ? 
C44 C39 C40 C41 -2.5(3) . . . . ? 
B1 C39 C40 C41 -177.64(16) . . . . ? 
F16 C40 C41 F17 0.1(2) . . . . ? 
C39 C40 C41 F17 -178.94(16) . . . . ? 
F16 C40 C41 C42 -179.34(15) . . . . ? 
C39 C40 C41 C42 1.6(3) . . . . ? 
F17 C41 C42 F18 -1.1(3) . . . . ? 
C40 C41 C42 F18 178.37(16) . . . . ? 
F17 C41 C42 C43 -179.42(16) . . . . ? 
C40 C41 C42 C43 0.0(3) . . . . ? 
F18 C42 C43 F19 -0.6(3) . . . . ? 
C41 C42 C43 F19 177.75(16) . . . . ? 
F18 C42 C43 C44 -178.89(16) . . . . ? 
C41 C42 C43 C44 -0.5(3) . . . . ? 
F19 C43 C44 F20 0.3(2) . . . . ? 
C42 C43 C44 F20 178.61(16) . . . . ? 
F19 C43 C44 C39 -178.77(16) . . . . ? 
C42 C43 C44 C39 -0.5(3) . . . . ? 
C40 C39 C44 F20 -177.16(15) . . . . ? 
B1 C39 C44 F20 -2.6(3) . . . . ? 
C40 C39 C44 C43 1.9(3) . . . . ? 
B1 C39 C44 C43 176.48(17) . . . . ? 
 
_diffrn_measured_fraction_theta_max    0.992 
_diffrn_reflns_theta_full              28.28 
_diffrn_measured_fraction_theta_full   0.992 
_refine_diff_density_max    0.641 
_refine_diff_density_min   -0.769 
_refine_diff_density_rms    0.064 

_symmetry_cell_setting           'Orthorhombic'
_symmetry_space_group_name_H-M   'Pbca '
_symmetry_space_group_name_Hall   '-P 2ac 2ab'

loop_
 _exptl_crystal_face_index_h
 _exptl_crystal_face_index_k
 _exptl_crystal_face_index_l
 _exptl_crystal_face_perp_dist
  -11.00    0.00  -30.00    0.0831
    8.00   19.00  -16.00    0.2066
  -12.00    0.00  -29.00    0.0538
    5.00   15.00  -24.00    0.1527
   -3.00  -21.00   12.00    0.3722
   -2.00  -22.00   -9.00    0.3430
    9.00    0.00   30.00    0.1123
   29.00    0.00   -5.00    0.2301
   16.00   -1.00  -27.00    0.1494
    3.00   -1.00  -32.00    0.0846
  -13.00    0.00   29.00    0.1296
   -4.00    0.00   32.00    0.0832
_audit_creation_date
;
'Thu Oct 09 10:57:45 2003'
;
_audit_creation_method_reference
;
CrysAlis RED, Oxford Diffraction Ltd.,
Version 1.171.10 beta (release 25.09.2003 CrysAlis171 VC++)
(compiled Sep 25 2003,17:01:25)
;
_computing_data_collection_reference
;
CrysAlis CCD, Oxford Diffraction Ltd.,
Version 1.171.10 beta (release 25.09.2003 CrysAlis171 VC++)
(compiled Sep 25 2003,17:01:25)
;
_computing_cell_refinment_reference
;
CrysAlis RED, Oxford Diffraction Ltd.,
Version 1.171.10 beta (release 25.09.2003 CrysAlis171 VC++)
(compiled Sep 25 2003,17:01:25)
;
_computing_data_reduction_reference
;
CrysAlis RED, Oxford Diffraction Ltd.,
Version 1.171.10 beta (release 25.09.2003 CrysAlis171 VC++)
(compiled Sep 25 2003,17:01:25)
;
_cell_measurement_theta_min       1.95 
_cell_measurement_theta_max       29.65 
_cell_measurement_resolution_max         0.72  
_cell_measurement_reflns_used         22007
_cell_measurement_temperature         100
_exptl_crystal_size_max                           0.37224
_exptl_crystal_size_mid                           0.16672
_exptl_crystal_size_min                           0.05384
_exptl_absorpt_coefficient_mu                     0.75139
_exptl_absorpt_correction_T_min                   0.70385
_exptl_absorpt_correction_T_max                   0.91275
_exptl_absorpt_correction_type            numerical
_exptl_absorpt_process_details
;
CrysAlis RED, Oxford Diffraction Ltd.,
Version 1.171.10 beta (release 25.09.2003 CrysAlis171 VC++)
(compiled Sep 25 2003,17:01:25)
Analytical numeric absorption correction using a multifaceted crystal
model based on expressions derived by R.C. Clark & J.S. Reid.
;
_diffrn_radiation_type 'Mo K\a'
_diffrn_radiation_source 'Enhance (Mo) X-ray Source'
_diffrn_radiation_monochromator 'graphite'
_diffrn_orient_matrix_UB_11      -0.0033083535
_diffrn_orient_matrix_UB_12       0.0214834016
_diffrn_orient_matrix_UB_13       0.0239562708
_diffrn_orient_matrix_UB_21       0.0018062648
_diffrn_orient_matrix_UB_22      -0.0256365053
_diffrn_orient_matrix_UB_23       0.0201783546
_diffrn_orient_matrix_UB_31       0.0426480345
_diffrn_orient_matrix_UB_32       0.0027700951
_diffrn_orient_matrix_UB_33       0.0010621478
_diffrn_measurement_details         'see scan set' 

loop_
 _diffrn_scan_number
 _diffrn_scan_type
 _diffrn_scan_start
 _diffrn_scan_end
 _diffrn_scan_width
 _diffrn_scan_exptime
 _diffrn_scan_omega
 _diffrn_scan_theta
 _diffrn_scan_kappa
 _diffrn_scan_phi
 _diffrn_scan_omega1
 _diffrn_scan_theta1
 _diffrn_scan_frames

 1 omega -41.00 62.50 0.75 10.00 - 30.00 -79.00 0.00 0.00 0.00 138 
 2 omega -41.00 62.50 0.75 10.00 - 30.00 -79.00 90.00 0.00 0.00 138 
 3 omega -41.00 62.50 0.75 10.00 - 30.00 -79.00 180.00 0.00 0.00 138 
 4 omega -41.00 62.50 0.75 10.00 - 30.00 -79.00 270.00 0.00 0.00 138 

_diffrn_measurement_method              ' omega scans'


_JHU_your_name_here       'Dr. Amy A Sarjeant'
_JHU_your_lab_here       'NCB 240'
_JHU_your_phone_number_here       'x6-8569'
_JHU_your_email_here       'xray@jhu.edu'

_JHU_Institutional_Source       'Karlin Lab'
_JHU_Submitting_Scientist       'Jean Quant'
_JHU_Scientist_Phone       '6-6161'
_JHU_Scientist_EMail       'quant@jhu.edu'

_JHU_identifying_number       'x0003'
_JHU_xray_labbook       '4'
_JHU_crystalization_labbook       'II-157'
_JHU_crystalization_solvent       'Methylene Chloride, Pentane'
_JHU_crystalization_method       'Evaporation'

_diffrn_source_power       '2'
_diffrn_source_voltage       '50'
_diffrn_source_current       '40'
_diffrn_measurement_device       'Kappa'
_diffrn_measurement_device_type       'Xcalibur3'
_diffrn_ambient_temperature       '100'

_JHU_diffraction_detector_distance       '50'
_JHU_quality_factor       '2'
